# Supplementary material
Source: ML conference proceedings conference paper supplement (https://openreview.net/forum?id=kL9nYFvs6O)

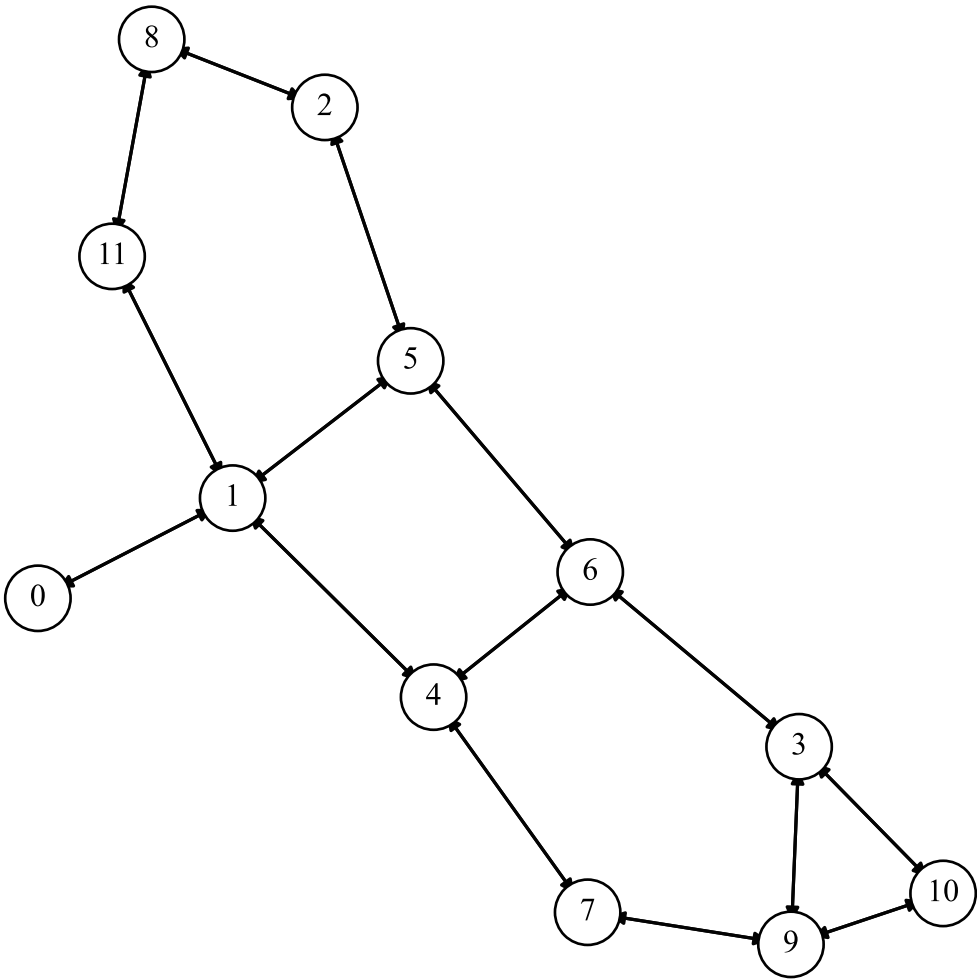

Supplement: supplementary_material [file Abilene.pdf › Supplementary_Material/Figs/Abilene.pdf]

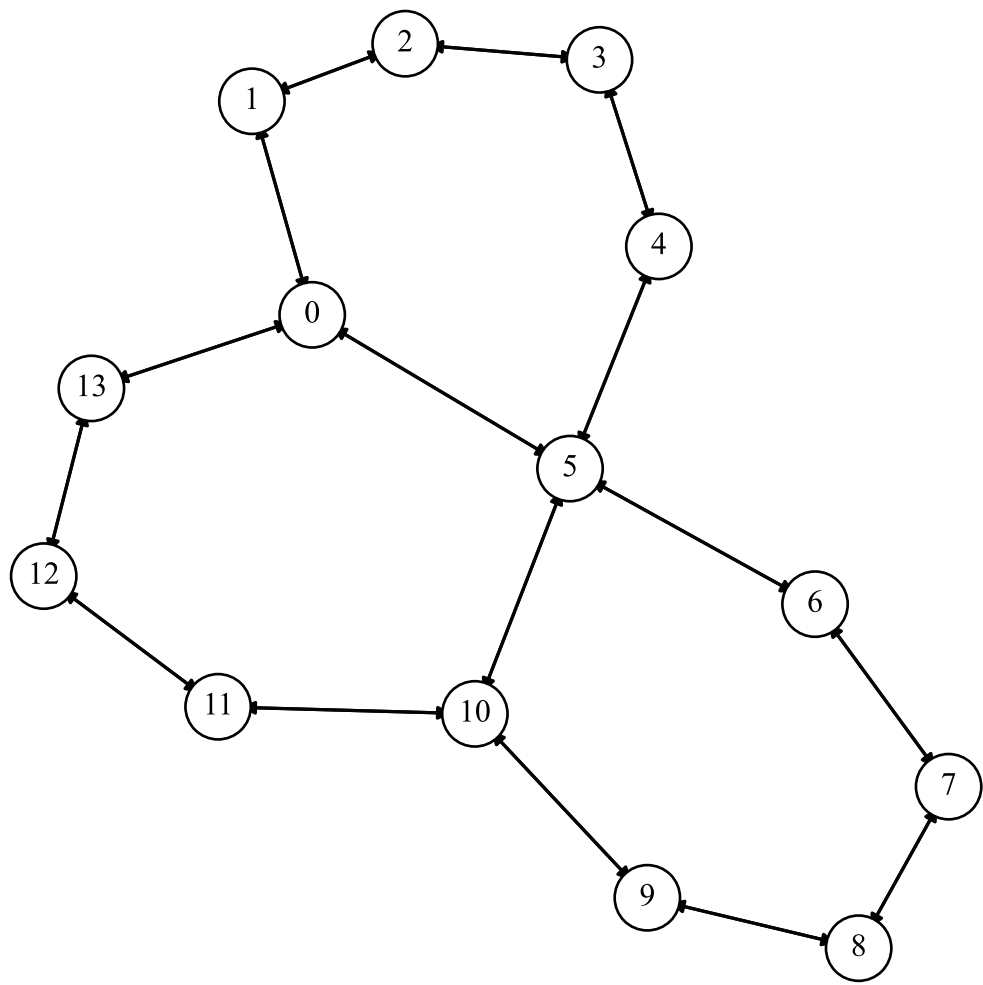

Supplement: supplementary_material [file CERNET.pdf › Supplementary_Material/Figs/CERNET.pdf]

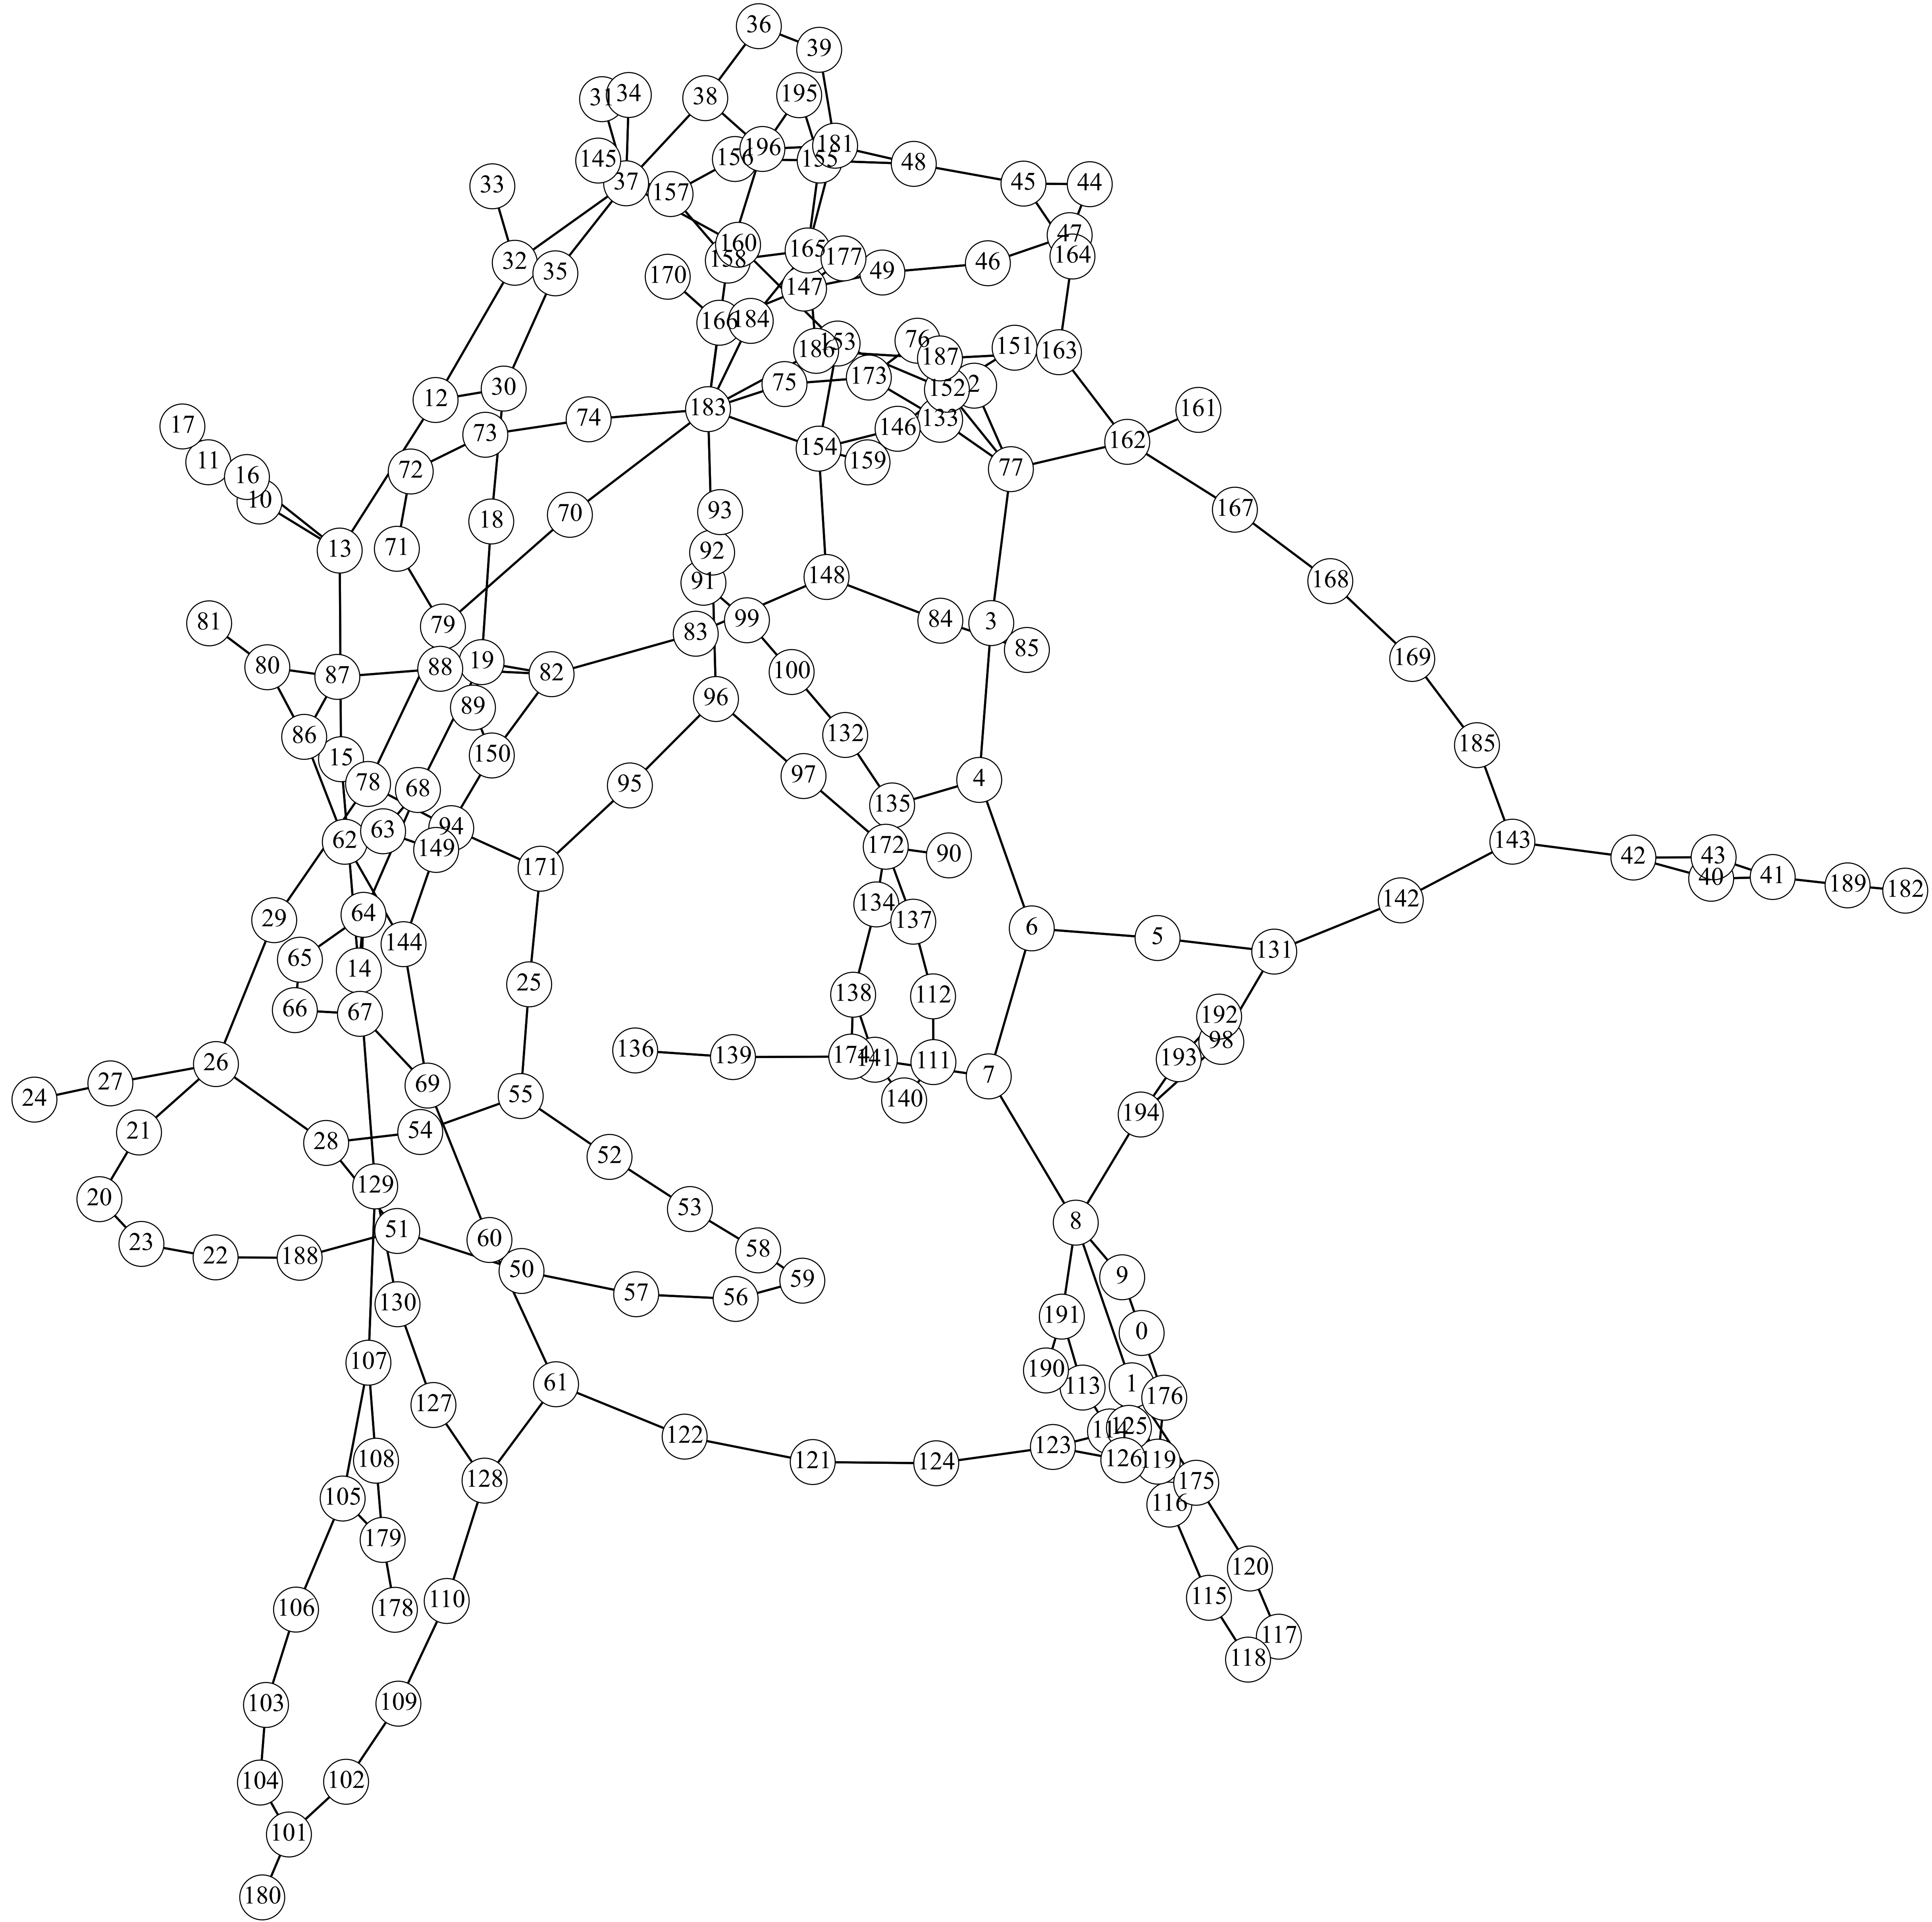

Supplement: supplementary_material [file Cogentco.pdf › Supplementary_Material/Figs/Cogentco.pdf]

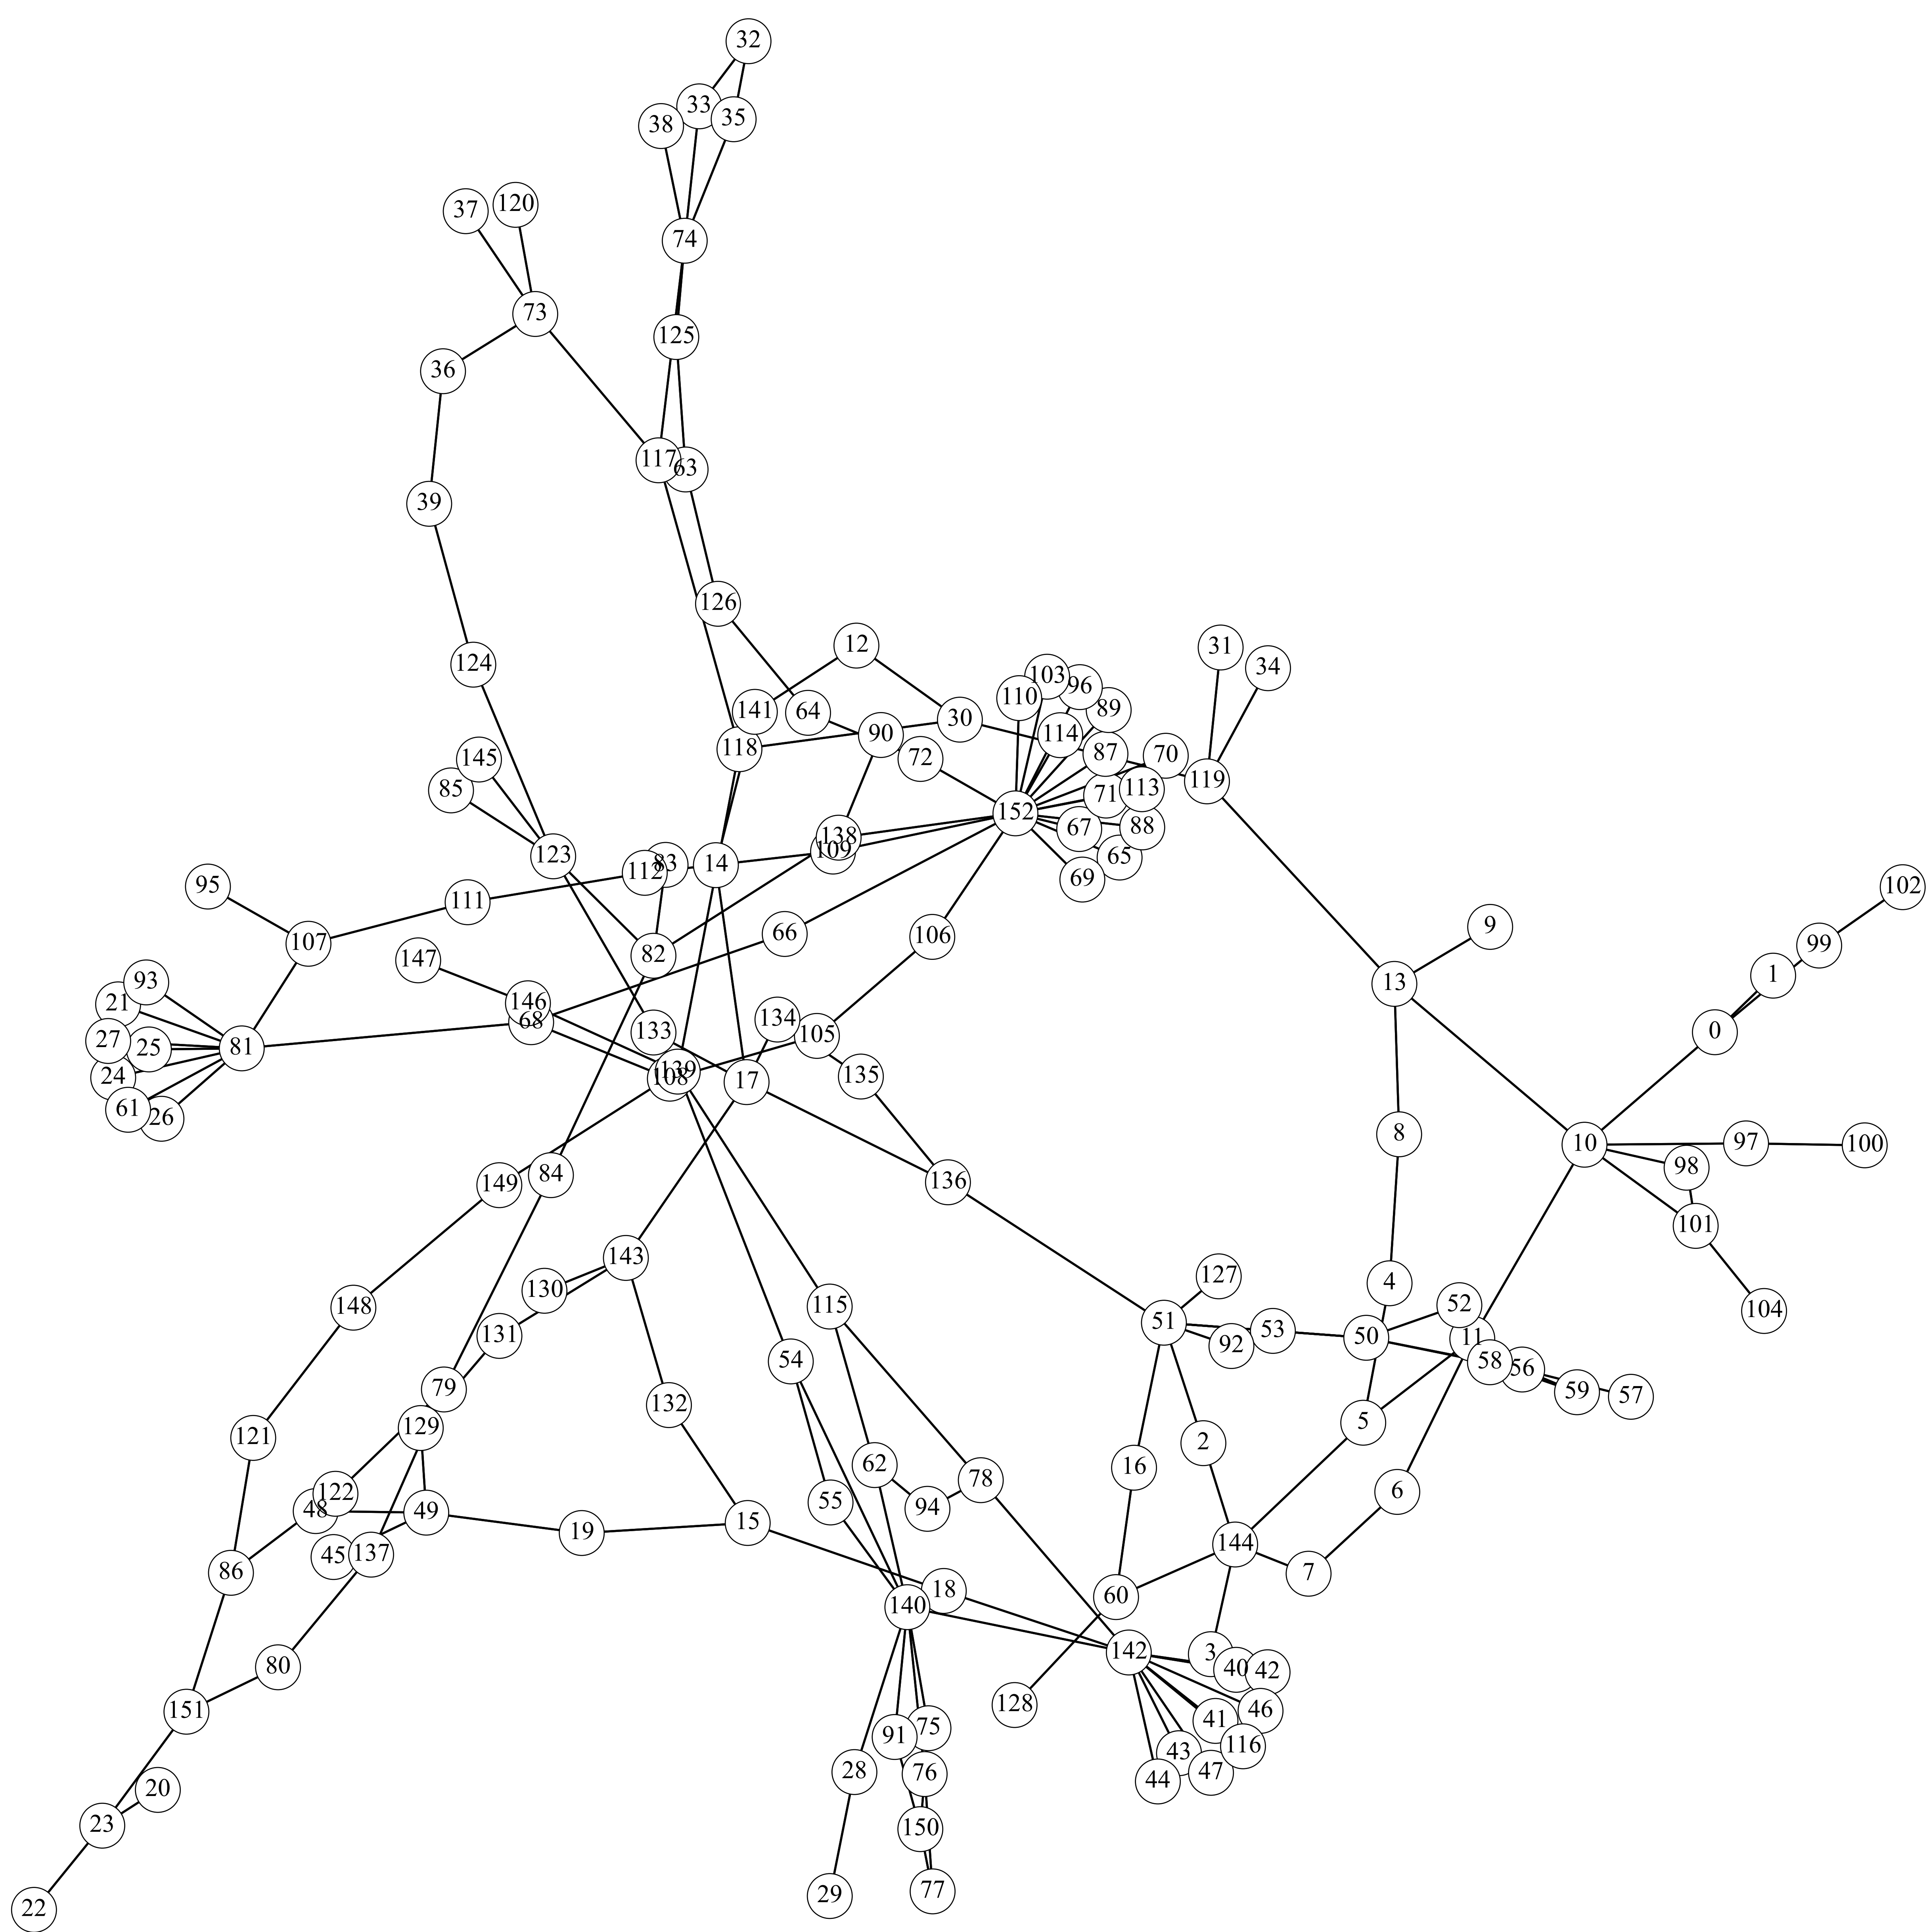

Supplement: supplementary_material [file Colt.pdf › Supplementary_Material/Figs/Colt.pdf]

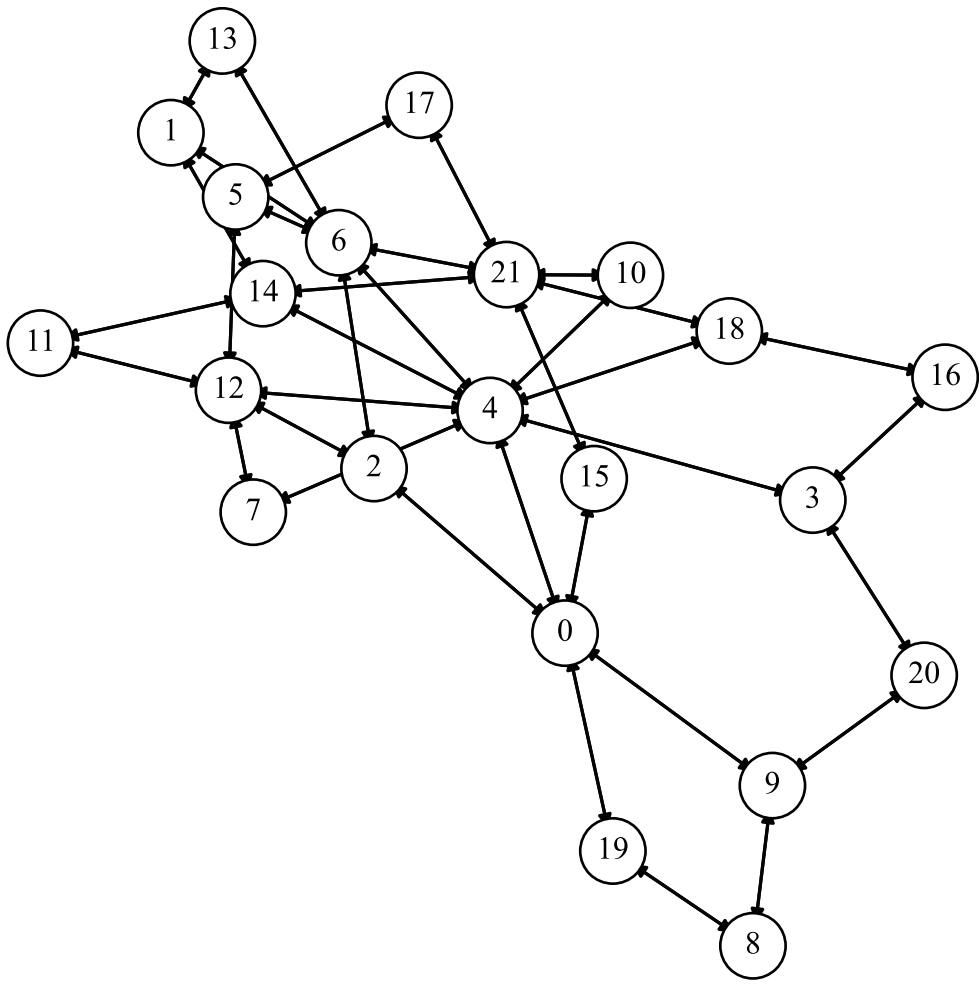

Supplement: supplementary_material [file GEANT.pdf › Supplementary_Material/Figs/GEANT.pdf]

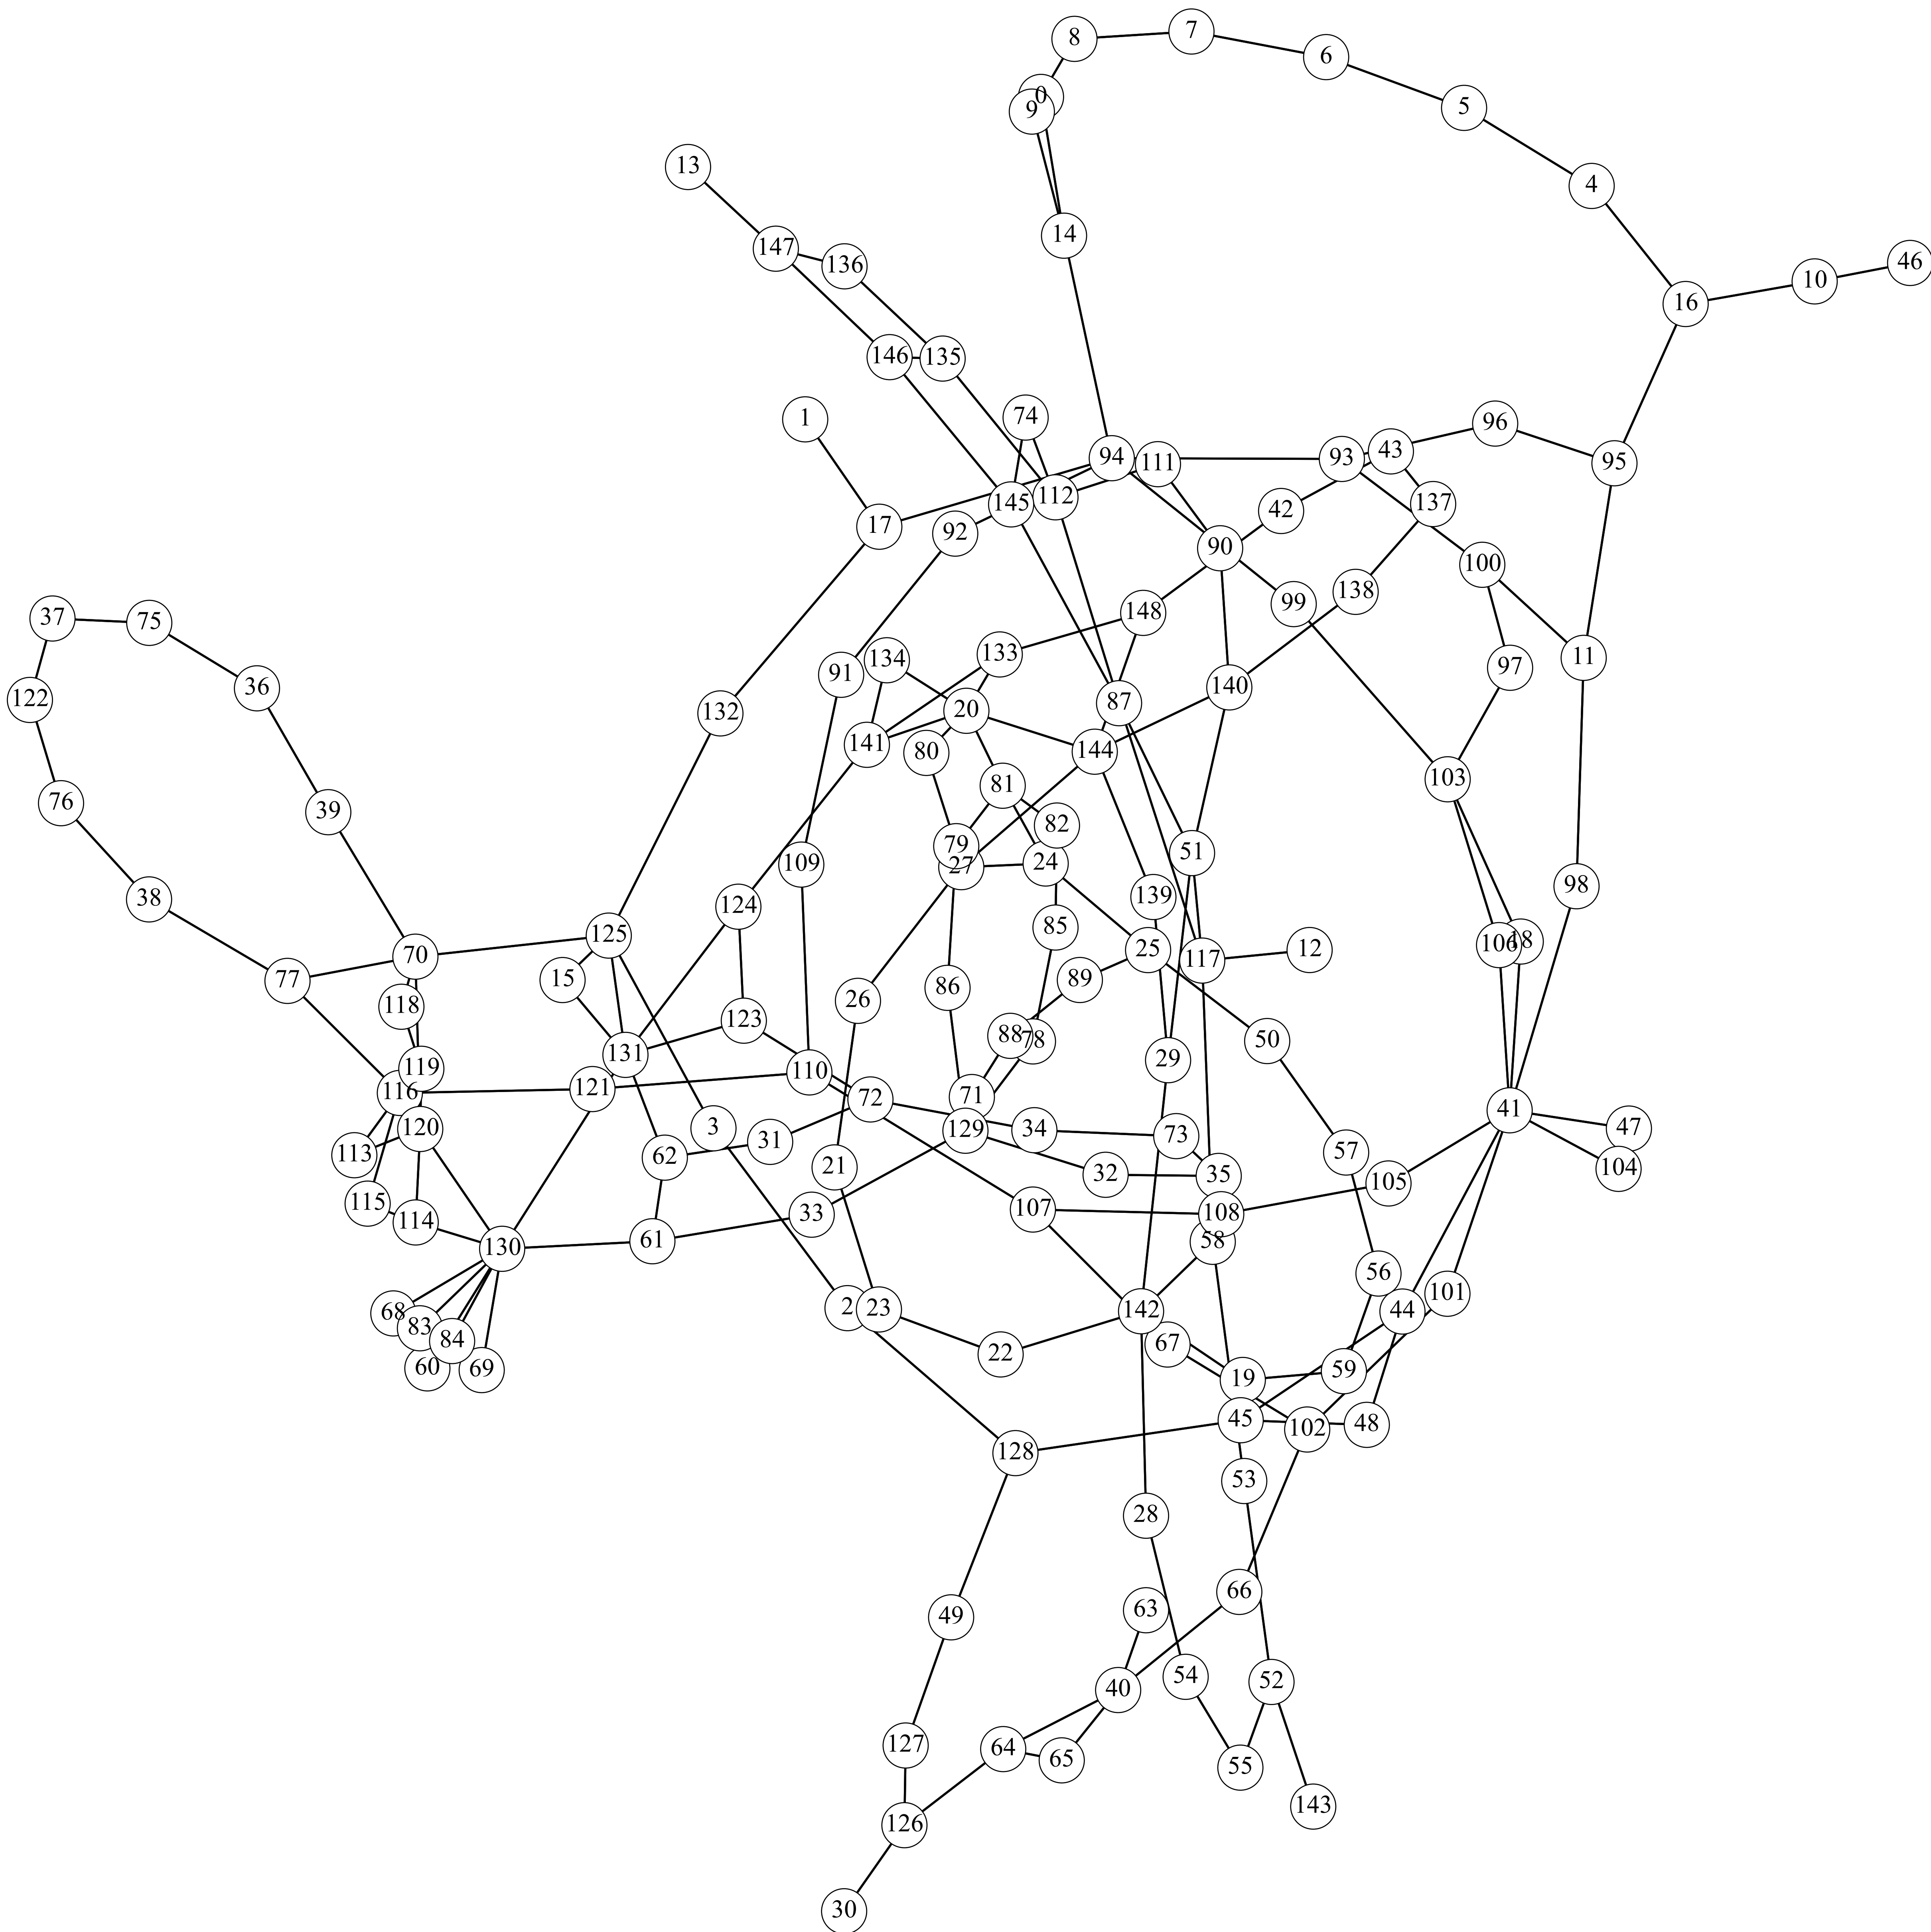

Supplement: supplementary_material [file GtsCe.pdf › Supplementary_Material/Figs/GtsCe.pdf]

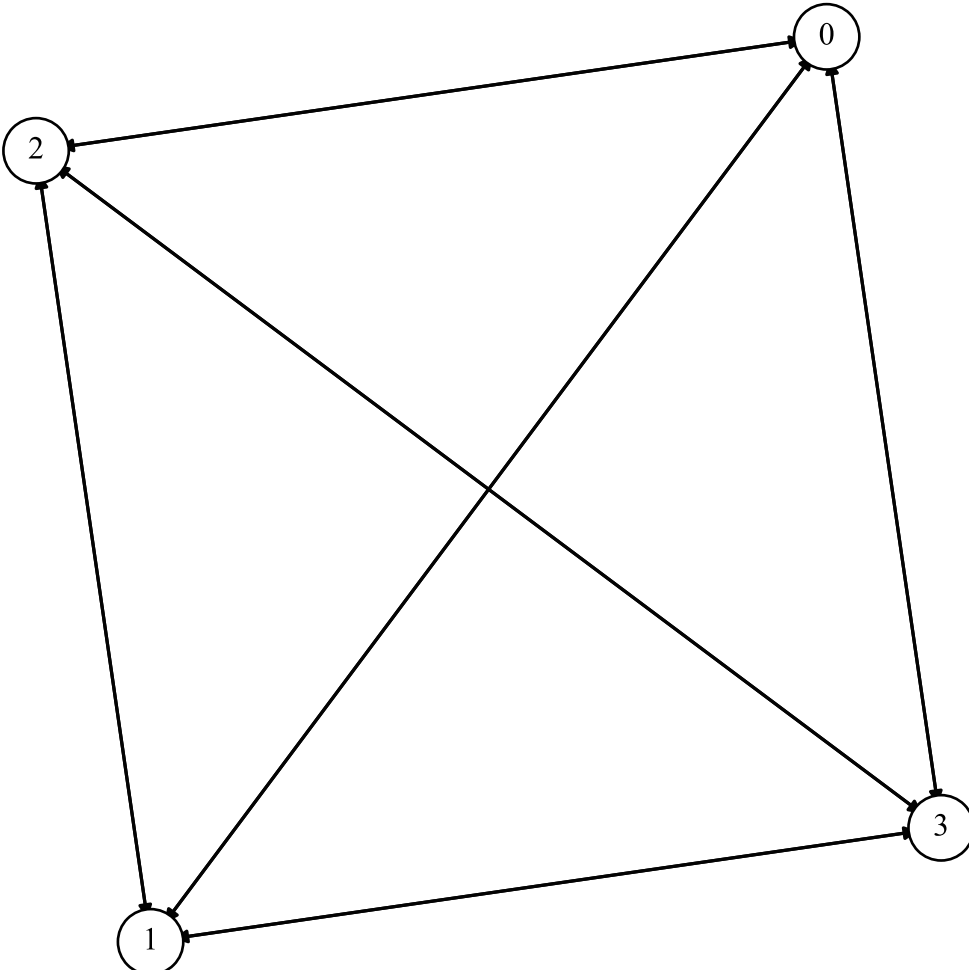

Supplement: supplementary_material [file Meta-DB.pdf › Supplementary_Material/Figs/Meta-DB.pdf]

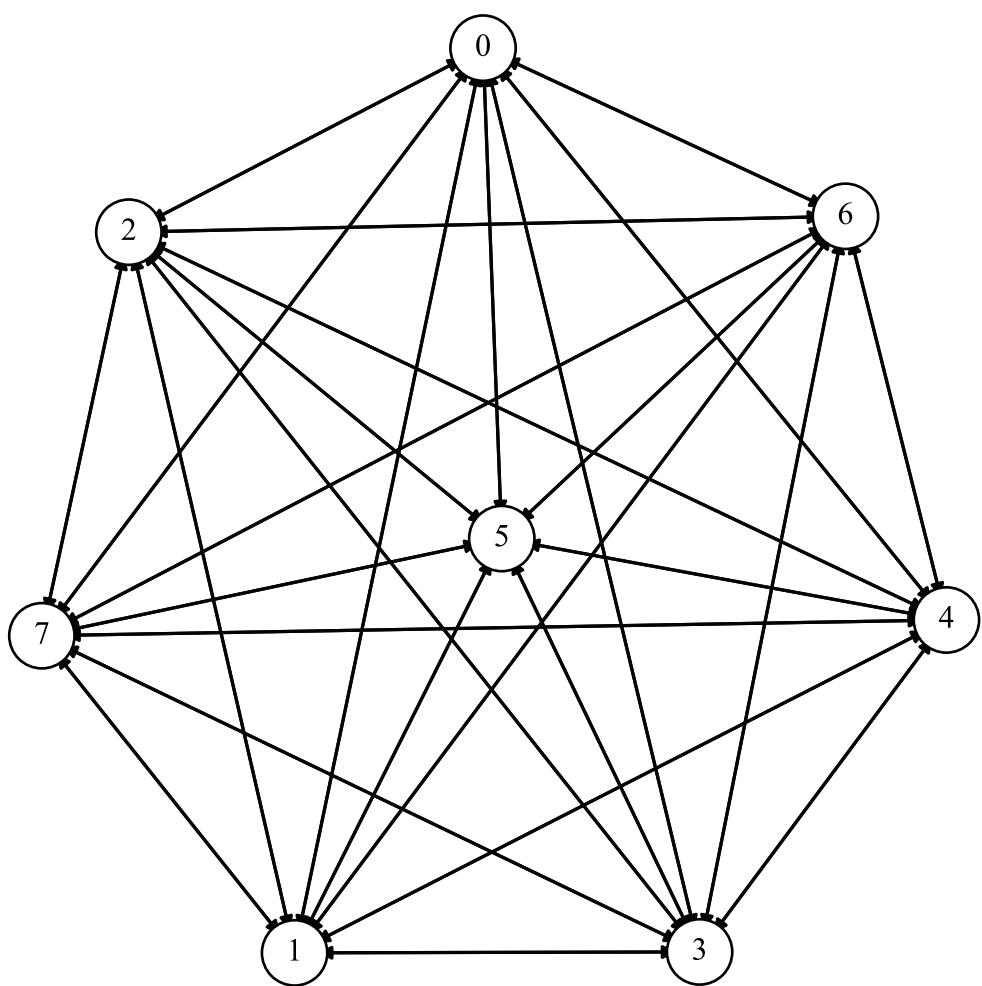

Supplement: supplementary_material [file Meta-WEB.pdf › Supplementary_Material/Figs/Meta-WEB.pdf]

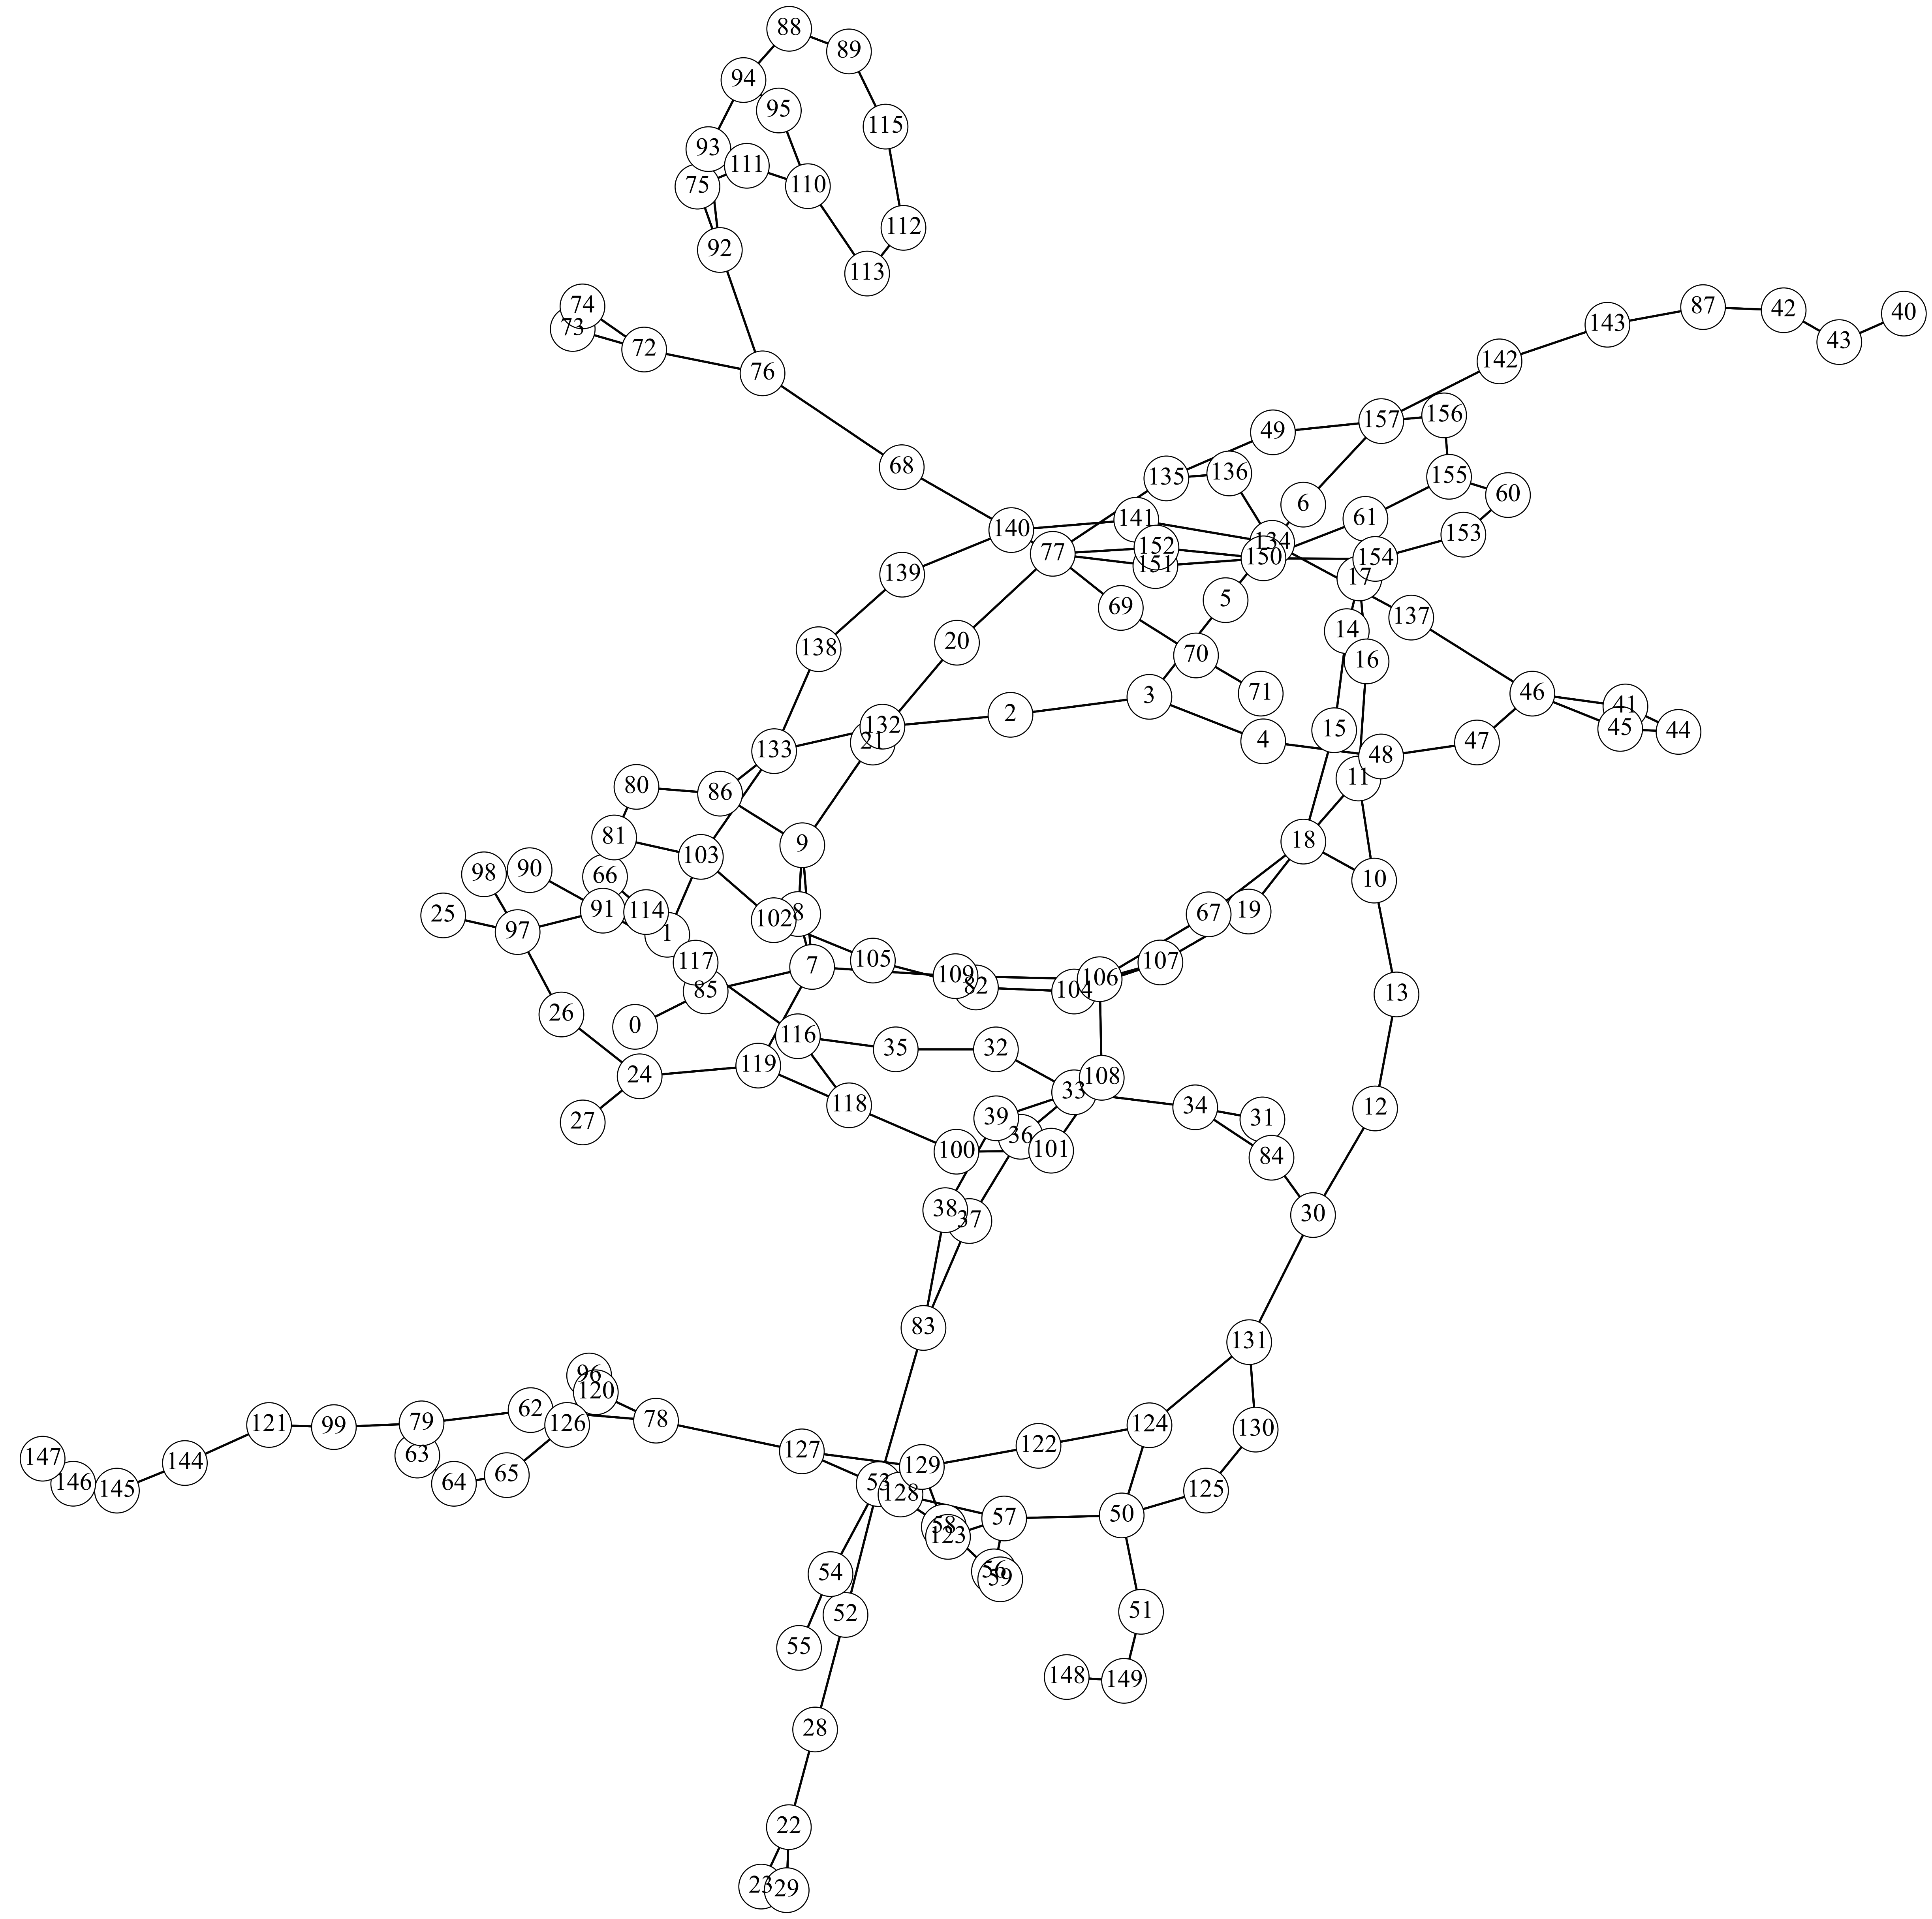

Supplement: supplementary_material [file UsCarrier.pdf › Supplementary_Material/Figs/UsCarrier.pdf]
